1 **Full title: The effect of primary health care on AIDS incidence and**  
2 **mortality: a cohort study of 3.4 million Brazilians**

3  
4 **Short title: Effect of primary health care on AIDS incidence and**  
5 **mortality in Brazil**

6  
7 Priscila FPS Pinto<sup>1,2</sup>; James Macinko<sup>3</sup>; Andréa F Silva<sup>1,2</sup>; Iracema Lua<sup>1,2</sup>; Gabriela  
8 Jesus<sup>1,2</sup>; Laio Magno<sup>4</sup>; Carlos AS Teles Santos<sup>2</sup>; Maria Yury Ichihara<sup>2</sup>; Mauricio L  
9 Barreto<sup>2</sup>; Corrina Moucheraud<sup>3</sup>; Luis E Souza<sup>1</sup>; Inês Dourado<sup>1</sup>; Davide Rasella<sup>1,5\*</sup>

10  
11  
12 1-Institute of Collective Health, Federal University of Bahia (ISC/UFBA), Salvador, Brazil

13 2-The Centre for Data and Knowledge Integration for Health (CIDACS-Fiocruz), Salvador,  
14 Brazil

15 3-Departments of Health Policy and Management and Community Health Sciences, Fielding  
16 School of Public Health, University of California (UCLA), Los Angeles, California, The United  
17 States of America (USA)

18 4-Department of Life Sciences, State University of Bahia (UNEB), Salvador, Brazil.

19 5-Instituto de Salud Global Barcelona (ISGlobal), Hospital Clínic - Universitat de Barcelona,  
20 Barcelona, Spain

21  
22  
23  
24 \*Corresponding Author

25 Telephone: +55 71 3336-0695

26 E-mail: [davide.rasella@gmail.com](mailto:davide.rasella@gmail.com)

27 Postal address: Institute of Collective Health, Federal University of Bahia (ISC/UFBA), Basílio  
28 da Gama Street, Canela, Salvador - BA, Postcode 40110-040 Salvador, Bahia state, Brazil.

29  
30  
31  
32  
33  
34  
35  
36  
37  
38  
39  
40  
41  
42  
43  
44 **NOTE: This preprint reports new research that has not been certified by peer review and should not be used to guide clinical practice.**

## 45 **Abstract**

46 *Background.* Primary Health Care (PHC) is essential for the health and wellbeing of  
47 people living with HIV/AIDS. This study evaluated the effects of one of the largest  
48 community-based PHC programs in the world, the Brazilian Family Health Strategy  
49 (FHS), on AIDS incidence and mortality.

50 *Methods.* A retrospective cohort study carried out in Brazil, from January 1 2007 to  
51 December 31 2015. We conducted a quasi-experimental effect evaluation using a  
52 cohort of 3,435,068  $\geq 13$  years low-income individuals who were members of the 100  
53 Million Brazilians Cohort, linked to AIDS diagnoses and deaths registries. We  
54 evaluated the effect of FHS on AIDS incidence and mortality and comparing outcomes  
55 between residents of municipalities with no FHS coverage with those in municipalities  
56 with full FHS coverage. We used multivariable Poisson regressions adjusted for all  
57 relevant municipal and individual-level demographic, socioeconomic, and contextual  
58 variables, and weighted with inverse probability of treatment weighting (IPTW). We  
59 also estimated FHS effect by sex and age, and performed a wide range of sensitivity  
60 and triangulation analyses.

61 *Findings.* FHS coverage was associated with lower AIDS incidence (rate ratio  
62 [RR]:0.76, 95%CI:0.68–0.84) and mortality (RR:0.68,95%CI:0.56–0.82). FHS effect  
63 was similar between men and women, but was larger in people aged  $\geq 35$  years old  
64 both for incidence (RR 0.62, 95%CI:0.53–0.72) and mortality (RR 0.56, 95%CI:0.43–  
65 0.72).

66 *Conclusions.* AIDS should be an avoidable outcome for most people living with HIV  
67 today, and our study shows that FHS coverage could significantly reduce AIDS  
68 incidence and mortality among low-income populations in Brazil. Universal access to

69 comprehensive healthcare through community-based PHC programs should be  
70 promoted to achieve the Sustainable Development Goals of ending AIDS by 2030.

71

72 *Funding.* Funded by the National Institute of Allergy and Infectious Diseases -  
73 NIAID/NIH, Grant Number: 1R01AI152938.

74

75 *Keywords:* Primary Health Care; Community Health; HIV/AIDS; Social Determinants  
76 of Health; Health Inequality; Brazil.

77

78

## 79 Introduction

80

81 In 2021, about 38.4 million people were living with HIV (PLWH) globally, with  
82 650,000 people dying from AIDS-related illnesses.<sup>1</sup> Strengthening Primary Health  
83 Care (PHC) has been identified as a key strategy to achieve the goal of ending AIDS  
84 by 2030.<sup>2</sup> PHC is an integrated health services that, when well-designed, and with  
85 universal and equitable coverage, provide comprehensive and coordinated care,  
86 including prevention and treatment for people living with HIV/AIDS (PLWHA).<sup>3,4</sup> HIV  
87 prevention takes place in PHC settings through voluntary counseling and testing,  
88 health promotion, and the prescribing of antivirals as pre- and post-exposure  
89 prophylaxis (PrEP and PEP) for non-HIV-infected patients.<sup>4</sup> Community-based PHC  
90 can promote the use of condoms and safe-sex behaviors, increase HIV testing cost-  
91 effectively, enabling early diagnosis, access and adherence to antiretroviral therapy  
92 (ART) resulting in reductions in HIV transmission, increasing ART uptake, leading to  
93 better viral suppression and retention in care, lower incidence and lower mortality in  
94 low- and middle-income countries (LMICs) contexts, reducing HIV/AIDS co-infections,  
95 comorbidities, and deaths.<sup>5–11</sup>

96 Moreover, decentralizing services to a countrywide PHC network should  
97 enhance recognition of population needs and improve testing uptake and linkage to  
98 care among key populations such as men who have sex with men, female sex workers  
99 and injecting drug users who have historically had difficulty accessing services through  
100 conventional healthcare providers.<sup>12</sup>

101 The Family Health Strategy (FHS) is the way Brazil's national health system  
102 provides community-based PHC, and is one of the world's largest and most evaluated  
103 PHC nationwide strategies. FHS characteristics include: universal access with no  
104 payment for services; coordinated and comprehensive preventive and curative care

105 delivered by a multidisciplinary team of a physician, a nurse, and community health  
106 workers (CHW); geographic empanelment of about 3,500 people residing near the  
107 health center's location; and monthly visits by a CHW who often lives in the area.<sup>13</sup>  
108 The FHS carries out rapid tests for HIV in the community, and updated clinical  
109 protocols have encouraged monitoring people with HIV at this level of care.<sup>13</sup> While  
110 the FHS has been associated with improved healthcare access and quality as well as  
111 better health outcomes<sup>14</sup> its impact on HIV/AIDS outcomes has never been studied.<sup>15</sup>  
112 Thus, the aim of this study was to evaluate the effect of a nationwide community-based  
113 PHC strategy on AIDS incidence and mortality using a unique cohort of 3.4 million  
114 lower-income Brazilians.

115

## 116 **Methods**

117

### 118 **Study design, population and ethical issues**

119

120 We conducted a quasi-experimental study based on longitudinal data from a  
121 cohort of 3.4 million low-income individuals aged 13 and older followed up for 9 years.  
122 These individuals represent a subgroup of the '100 Million Brazilians Cohort' based on  
123 a set of inclusion criteria discussed below. The study protocol was previously  
124 published.<sup>16</sup>

125 This study was approved by the research ethics committee of the Federal  
126 University of Bahia, under number 41691315.0.0000.5030 (Report No:3.783.920).  
127 The '100 Million Brazilians Cohort' is based on the linkage of administrative data and  
128 did not require an additional consent form.

129

## 130 Data sources

131

132 The '100 Million Brazilians Cohort' was previously constructed using the  
133 Brazilian national database for social benefits—the Cadastro Único (CadUnico)—  
134 which comprises the poorest half of the Brazilian population and is used in determining  
135 eligibility for social welfare programs.<sup>17</sup> This cohort was then linked to the National  
136 Disease Notification System (SINAN), a registry of notifiable diseases, and the  
137 Mortality Information System (SIM), that registers all deaths and their causes classified  
138 by International Classification of Diseases (ICD-10) codes (see Appendix p.2).

139 These databases were combined using a previously-validated record linkage  
140 tool based on the name of the individual and that of their mother, date of birth, sex,  
141 and municipality of residence in a two-step procedure.<sup>17,18</sup> In the first step, the linkage  
142 is deterministic. In the second step, entries that were not linked deterministically were  
143 then linked probabilistically based on a similarity score between all the pairwise  
144 comparisons (i.e., ranging from 0 to 1); entries with the highest similarity scores were  
145 considered to be linked pairs.<sup>18</sup>

146 CadUnico records were linked to municipal FHS coverage data by municipality  
147 code with deterministic linkage. Annual FHS coverage was calculated according to the  
148 Brazilian Ministry of Health definition: the total number of FHS teams deployed in the  
149 municipality in that year multiplied by 3,450—representing the average number of  
150 individuals served by each FHS team—divided by the population of the municipality.  
151 (Appendix p. 2-3)

152 The complete Cohort contains information on 114,008,306 individuals. We  
153 applied several inclusion criteria to develop our analytical sample as follows: 1) dates  
154 - excluding those with registration dates in CadUnico or AIDS diagnosis outside of the

155 study period from Jan 1, 2007 to Dec 31, 2015 (the time period for which national AIDS  
156 data were available); 2) treated population - those individuals resident in municipalities  
157 where the FHS had 100% coverage over all the study period; 3) comparison  
158 (untreated) population - those individuals residing in municipalities where public health  
159 facilities provided care via the FHS for less than 20% of the population over all the  
160 study period. We used the threshold of <20% coverage for the comparison group -  
161 instead of lower coverage levels – in order to: a) capture a higher number of individuals  
162 (considering the very low number of municipalities with zero FHS coverage over the  
163 all study period), b) given the evidence from the literature that low incipient FHS  
164 coverage is poorly effective,<sup>19</sup> c) because these thresholds has been used by similar  
165 individual-based PHC evaluation studies,<sup>20</sup> and d) because FHS needs a municipal  
166 coverage greater than 70% to realize its potential according to previous studies.<sup>19</sup>  
167 However, lower thresholds have been tested in the sensitivity analyses. Moreover, our  
168 study population was selected based on 4) Data availability - excluding individuals  
169 without complete information for all covariates; and 5) transmission - excluding  
170 individuals infected with HIV through vertical transmission.

171

## 172 Outcomes

173

174 Outcomes included: i) AIDS incidence, i.e., new AIDS cases, defined by  
175 adapted Centers for Disease Control and Prevention (CDC) criteria, Rio de  
176 Janeiro/Caracas criteria, and Death Criterion;<sup>21</sup> and ii) AIDS mortality rate, i.e., deaths  
177 where the underlying cause of death was ICD-10 codes B20 to B24.<sup>21</sup> Each measure  
178 was divided by person-years at risk and multiplied by 100,000. Follow-up time was  
179 calculated from the date of entry into the cohort until diagnosis of AIDS, death from

180 AIDS, death from any cause, or the end of the cohort (December 31, 2015), whichever  
181 came first.

182

## 183 Statistical analyses

184

185 We performed descriptive analyses of the study population by FHS coverage  
186 for each outcome and for selected independent variables. These included  
187 demographic characteristics (sex and age), socioeconomic status (skin color, per  
188 capita household expenditures, educational attainment, home construction material,  
189 number of individuals per room), year of entry into the cohort, time of receipt of the  
190 Brazilian conditional cash transfer program Bolsa Família (in months, 0 if the family  
191 was not a beneficiary), and annual cumulative AIDS incidence for each individual's  
192 municipality of residence from the study cohort, used as proxy of the municipal-level  
193 endemic burden of AIDS.

194 We selected these variables based on a conceptual framework of the main  
195 structural determinants of HIV infection, AIDS incidence and mortality, and of the  
196 hypothesized effects of PHC on each step of the evolution of the disease (Appendix,  
197 p. 4). Associations between FHS exposure and AIDS incidence and mortality rates  
198 were estimated using multivariable Poisson regression models adjusted for all these  
199 relevant individual and municipal-level demographic and socioeconomic confounding  
200 variables, including follow-up time as an offset variable, with observations weighted  
201 using stabilized truncated inverse probability of treatment weighting (IPTW), a  
202 consolidated method to evaluate the impact of PHC, and other interventions, with the  
203 100 Million Brazilians Cohort.<sup>20</sup>



204 We first calculated the IPT weights using multivariable logistic regression  
205 models that take into account the probability that each individual lives in a municipality  
206 with 100% FHS coverage. Independent variables of the regression included all the  
207 baseline demographic and socioeconomic characteristics cited above. Considering Pt  
208 as the marginal probability of treatment in the population and PSmul as the propensity  
209 score obtained from the multivariable logistic regression adjusted for all independent  
210 variables, we calculated the IPTW using the formula  $(1 - Pt) / (1 - PSmul)$  for non-  
211 treated individuals and used the formula  $Pt / PSmul$  for treated individuals. As is  
212 standard practice, we dropped extreme weights that were below the first percentile or  
213 above the 99th percentile. We then adjusted the IPT weighted multivariable Poisson  
214 regression using the same demographic and socioeconomic covariates used to  
215 calculate the first stage weights along with: household economic conditions (water  
216 supply, type of lighting, garbage disposal and sewage), and municipal conditions  
217 (unemployment rate, hospital beds per 1,000 inhabitants). Multivariable logistic  
218 regression models for the prediction of the propensity scores, and the odds ratios (OR)  
219 for each covariate are presented in Appendix, p. 6.

220 For each model, multicollinearity was assessed using Variance Inflation Factors  
221 (VIF). Subgroup analyses included models by sex and age (under or over the mean  
222 age, i.e., 13-34 years and  $\geq 35$  years), and additional stratifies were used as  
223 complementary analysis (Appendix, p. 7).

224

## 225 Sensitivity analyses

226 Sensitivity analyses (Appendix p. 8-16) included first, investigating the effect of  
227 defining the comparison group as those living in municipalities with either 0% or with  
228 10% FHS coverage over the study period, to test if the threshold used for the untreated

229 individuals (20%) affected our estimates. Second, we performed a negative binomial  
230 regression model comparing results to those found using the IPTW Poisson regression  
231 model, to evaluate the robustness of results to other regression specifications. Third,  
232 we performed the same multivariable Poisson regressions without IPTW to assess the  
233 potential of IPTW for obtaining unbiased FHS estimates. Fourth, we conducted IPTW  
234 regressions without the municipal covariates to test the influence of municipal context  
235 and resources on our results. This analysis helped to identify whether FHS coverage  
236 was truly driving the observed association or whether it was simply collinear with other  
237 municipal characteristics. Fifth, we fitted the IPTW Poisson regressions only with a  
238 subset of municipalities with high quality of vital information – according to  
239 consolidated criteria<sup>22</sup> - to check if the results are different from the main analysis.  
240 Sixth, mortality from external causes (ICD-10 codes V01-Y98) was included as a  
241 negative control, since the FHS was not expected to influence them. Seventh, marital  
242 status was included in the IPTW regressions as adjusting variable -even with its high  
243 number of missing values- to verify if it was a relevant confounder. Eighth, to assess  
244 the differences between treated and untreated individuals in relation to sexual  
245 preferences and behavior, we estimated the percentage of MSM – variable only  
246 available in the records of AIDS cases – in the two groups. We also did complementary  
247 tests dividing the analysis in 2 periods, i.e., up to 2010 and after 2011, to check  
248 possible differences related to changes in treatments and protocols over the period.  
249 We chose for 2011 because in this year PHC started carrying out rapid HIV tests<sup>12</sup>  
250 (Appendix p. 17-24). We also used the records of HIV cases from 2014, year in which  
251 they started to be compulsorily notified, to assess if FHS exposure was also associated  
252 with potential HIV reductions (even if available study period was of only 2 years).  
253 Finally, we performed a triangulation test<sup>23</sup>, using Cox regression (survival analysis)

254 to estimate the FHS effects on AIDS incidence, and compared these findings with our  
255 main results (Appendix p. 24). All analyses were performed using STATA version 15.0.

256

## 257 Role of the funding source

258

259 The funding source had no role in study design, data collection, data analysis,  
260 data interpretation or the writing of the report.

261

## 262 Results

263

264 We studied 3,435,068 individuals— 605,890 lived in municipalities with zero (or  
265 very low) FHS coverage and 2,829,178 lived in municipalities with full FHS coverage  
266 during the entire study period (Fig 1). As presented in table 1, although most of the  
267 demographic and socioeconomic variables were relatively similar between the two  
268 groups, there were also differences in some variables: compared to untreated  
269 municipalities, treated municipalities had more men, people of pardo skin color, lower  
270 percentage of people with per capita expenses greater than 1 minimum monthly wage,  
271 less individuals with more than 9 years of schooling, with garbage disposal and with  
272 sewage.

273

274

275

276

277

278

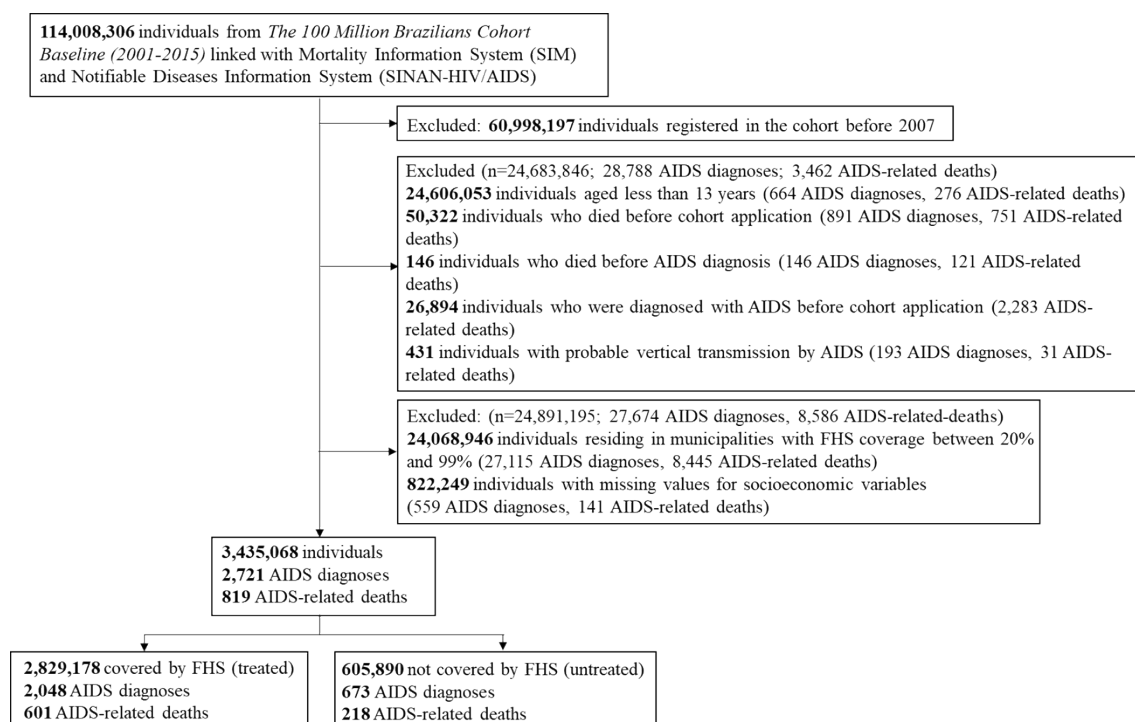

279

280 Figure 1. Selection flowchart of the study cohort, The 100 Million Brazilians Cohort, 2007-15

281 Table 1. Individuals treated and untreated by the Family Health Strategy, The 100 Million  
282 Brazilians Cohort, Brazil, 2007–15

| Variables                                | Untreated<br>n=605,890 | Treated<br>n=2,829,178 |
|------------------------------------------|------------------------|------------------------|
| Sex                                      |                        |                        |
| Female                                   | 335,123 (55.3)         | 1,313,027 (46.4)       |
| Male                                     | 270,767 (44.7)         | 1,516,151 (53.6)       |
| Age (years)                              |                        |                        |
| 13-24                                    | 164,746 (27.2)         | 936,715 (33.1)         |
| 25-59                                    | 353,953 (58.4)         | 1,489,187 (52.6)       |
| ≥60                                      | 87,191 (14.4)          | 403,276 (14.2)         |
| Skin color                               |                        |                        |
| White                                    | 330,124 (54.5)         | 811,834 (28.7)         |
| Asian                                    | 2,252 (0.4)            | 12,737 (0.4)           |
| Pardo                                    | 230,255 (38.0)         | 1,807,417 (63.9)       |
| Black                                    | 42,755 (7.1)           | 184,566 (6.5)          |
| Indigenous                               | 484 (0.1)              | 13,074 (0.5)           |
| Per capita household expenditures - % MW |                        |                        |
| >1                                       | 125,660 (20.7)         | 206,429 (7.3)          |
| 0.5-1                                    | 172,715 (28.5)         | 519,210 (18.3)         |
| 0.25-0.49                                | 78,011 (12.9)          | 402,676 (14.2)         |
| 0-0.24                                   | 119,368 (19.7)         | 623,509 (22.0)         |
| Nothing declared                         | 110,136 (18.2)         | 1,077,354 (38.1)       |
| Education (years of study)               |                        |                        |
| >9                                       | 194,862 (32.2)         | 637,528 (22.5)         |
| 4-9                                      | 165,858 (27.4)         | 686,521 (24.3)         |
| 1-4                                      | 197,210 (32.6)         | 1,003,227 (35.5)       |
| Illiterate, never attended school        | 47,960 (7.9)           | 502,072 (17.7)         |
| Water supply                             |                        |                        |
| Public network                           | 535,461 (88.4)         | 1,814,420 (64.1)       |
| Well, spring or cistern                  | 70,429 (11.6)          | 1,014,758 (35.9)       |
| Home construction material               |                        |                        |
| Brick                                    | 558,976 (92.3)         | 2,113,608 (74.7)       |
| Wood or taipa <sup>1</sup>               | 46,914 (7.7)           | 715,570 (25.3)         |
| Lighting                                 |                        |                        |
| Electricity                              | 554,155 (91.5)         | 2,504,416 (88.5)       |

|                                                                       |                 |                  |
|-----------------------------------------------------------------------|-----------------|------------------|
| No electricity                                                        | 51,735 (8.5)    | 324,762 (11.5)   |
| Number of individuals per room                                        |                 |                  |
| 1                                                                     | 657,772 (94.1)  | 3,306,091 (96.3) |
| 1-2                                                                   | 36,202 (5.2)    | 109,571 (3.2)    |
| >2                                                                    | 5,056 (0.7)     | 15,703 (0.5)     |
| Garbage disposal                                                      |                 |                  |
| Public network                                                        | 572,471 (94.5)  | 1,794,901 (63.4) |
| Burned, buried or another                                             | 33,419 (5.5)    | 1,034,277 (36.6) |
| Sewage                                                                |                 |                  |
| Public network                                                        | 472,462 (78.0)  | 708,550 (25.0)   |
| Septic tank                                                           | 34,699 (5.7)    | 621,743 (22.0)   |
| Rudimentary cesspit/ditch or another                                  | 98,729 (16.3)   | 1,498,885 (53.0) |
| Year of entry into the cohort                                         |                 |                  |
| 2007                                                                  | 93,461 (15.4)   | 867,836 (30.7)   |
| 2008                                                                  | 45,980 (7.6)    | 284,319 (10.1)   |
| 2009                                                                  | 42,595 (7.0)    | 255,916 (9.0)    |
| 2010                                                                  | 56,117 (9.3)    | 213,462 (7.6)    |
| 2011                                                                  | 75,914 (12.5)   | 228,745 (8.1)    |
| 2012                                                                  | 90,888 (15.0)   | 339,253 (12.0)   |
| 2013                                                                  | 51,864 (8.6)    | 228,104 (8.1)    |
| 2014                                                                  | 82,339 (13.6)   | 252,160 (8.9)    |
| 2015                                                                  | 66,732 (11.0)   | 158,883 (5.6)    |
| Time receiving Bolsa Família, months                                  | 30.13 (39.70)   | 52.27 (54.14)    |
| AIDS municipal incidence among individuals in the cohort <sup>2</sup> | 112.45 (100.23) | 70.09 (76.28)    |
| Municipal unemployment rate, %                                        | 7.00 (3.08)     | 7.70 (4.17)      |
| Hospital beds per 1,000 inhabitants                                   | 1.97 (1.56)     | 1.96 (1.99)      |

283 CI=Confidence Interval; %MW - Proportional to the baseline minimum wage (MW).

284 1- Taipa is a construction method that consists of using clay and wood to build houses

285 2- Annual cumulative AIDS incidence for each individual's municipality of residence from the study cohort

286

287

288           There were 2,721 new cases of AIDS during the study period, the mean AIDS  
 289 incidence rate over the period was higher (25.6 per 100,000 person-years) among  
 290 individuals living in municipalities with no FHS coverage, than among individuals living  
 291 in municipalities with full FHS coverage (13.2 per 100,000 person-years). During  
 292 follow-up 819 AIDS deaths occurred, in the untreated group the AIDS mortality rate  
 293 was higher (8.3 per 100,000 person-years) than among the treated group (3.9 per  
 294 100,000 person-years) (Table 2).

295 Table 2. AIDS incidence and mortality rates according to Family Health Strategy (FHS)  
 296 coverage, Brazil, 2007–15

| Outcome                                              | Untreated<br>N=605,890 | Treated<br>N=2,829,178 | Total<br>N=3,435,068 |
|------------------------------------------------------|------------------------|------------------------|----------------------|
| AIDS incidence rate per 100,000 person-years (95%CI) | 25.57 (23.71-27.58)    | 13.21 (12.65-13.80)    | 15.00 (14.45-15.58)  |
| AIDS mortality rate per 100,000 person-years (95%CI) | 8.28 (7.25-9.45)       | 3.88 (3.58-4.20)       | 4.51 (4.22-4.83)     |

297 CI=Confidence Interval

298

299 FHS coverage was associated with a reduction in AIDS incidence (RR 0.76,  
 300 95% CI 0.68–0.84), and – with a greater magnitude – with a reduction in AIDS-related  
 301 mortality (RR 0.68, 95% CI 0.56–0.82) (Table 3). Demographic and socioeconomic  
 302 adjusting variables showed an overall risk effect of being aged 25–59 years, pardo and  
 303 black skin color, having a lower level of education, and, having a lower per capita  
 304 expenditure, while a protective factor for AIDS incidence was being aged ≥60 and  
 305 reside in a home whose garbage disposal was in the public network (Table 3). The  
 306 cumulative hazard curves of AIDS incidence and mortality indicates that there was a  
 307 high and prolonged protective effect of FHS coverage, mainly for AIDS mortality  
 308 (Appendix, p. 24).

309 Table 3. Inverse probability of treatment weighting Poisson regression models, adjusted for all  
 310 demographic and socioeconomic variables, for the association between AIDS incidence and  
 311 mortality rate and Family Health Strategy coverage in the study cohort, Brazil, 2007–15

| Variables                      | AIDS incidence<br>n=3,435,068<br>RRa (CI 95%) | AIDS mortality<br>n=3,435,068<br>RRa (CI 95%) |
|--------------------------------|-----------------------------------------------|-----------------------------------------------|
| FHS coverage                   |                                               |                                               |
| <20%                           | 1                                             | 1                                             |
| 100%                           | 0.76 (0.68-0.84)                              | 0.68 (0.56-0.82)                              |
| Sex                            |                                               |                                               |
| Female                         | 1                                             | 1                                             |
| Male                           | 1.11 (1.02-1.21)                              | 1.15 (0.98-1.34)                              |
| Age (years)                    |                                               |                                               |
| 13-24                          | 1                                             | 1                                             |
| 25-59                          | 1.97 (1.79-2.17)                              | 3.52 (2.86-4.32)                              |
| ≥60                            | 0.40 (0.31-0.52)                              | 0.95 (0.63-1.43)                              |
| Skin color                     |                                               |                                               |
| White                          | 1                                             | 1                                             |
| Asian                          | 1.43 (0.74-2.77)                              | 1.73 (0.55-5.42)                              |
| Pardo                          | 1.38 (1.25-1.52)                              | 1.51 (1.25-1.82)                              |
| Black                          | 1.72 (1.49-1.99)                              | 1.83 (1.42-2.36)                              |
| Indigenous                     | 1.08 (0.54-2.17)                              | 0.51 (0.07-3.63)                              |
| Education (years of study)     |                                               |                                               |
| >9                             | 1                                             | 1                                             |
| 4-9                            | 1.52 (1.34-1.72)                              | 2.41 (1.85-3.14)                              |
| 1-4                            | 1.42 (1.25-1.61)                              | 2.32 (1.78-3.02)                              |
| No education                   | 1.27 (1.08-1.48)                              | 2.26 (1.65-3.11)                              |
| Per capita expenditures - % MW |                                               |                                               |
| >1                             | 1                                             | 1                                             |
| 0.5-1                          | 1.45 (1.16-1.82)                              | 1.86 (1.18-2.95)                              |
| 0.25-0.49                      | 1.79 (1.41-2.27)                              | 1.99 (1.22-3.26)                              |
| 0-0.24                         | 2.00 (1.57-2.56)                              | 2.67 (1.62-4.39)                              |
| Nothing declared               | 2.21 (1.71-2.83)                              | 2.79 (1.67-4.63)                              |
| Home construction material     |                                               |                                               |
| Brick                          | 1                                             | 1                                             |
| Wood or taipa <sup>1</sup>     | 1.18 (1.07-1.31)                              | 1.10 (0.91-1.33)                              |

|                                                                       |                  |                  |
|-----------------------------------------------------------------------|------------------|------------------|
| Water supply                                                          |                  |                  |
| Public network                                                        | 1                | 1                |
| Well, spring or cistern                                               | 0.89 (0.80-1.00) | 0.85 (0.69-1.04) |
| Lighting                                                              |                  |                  |
| Electricity                                                           | 1                | 1                |
| No electricity                                                        | 1.18 (1.04-1.34) | 1.15 (0.91-1.46) |
| Garbage disposal                                                      |                  |                  |
| Public network                                                        | 1                | 1                |
| Burned, buried or another                                             | 0.65 (0.57-0.73) | 0.70 (0.56-0.89) |
| Sewage                                                                |                  |                  |
| Public network                                                        | 1                | 1                |
| Septic tank                                                           | 0.81 (0.71-0.91) | 0.80 (0.64-1.01) |
| Rudimentary cesspit/ditch or another                                  | 0.90 (0.81-1.00) | 0.89 (0.73-1.07) |
| Number of individuals per room                                        |                  |                  |
| 1                                                                     | 1                | 1                |
| 1-2                                                                   | 1.02 (0.82-1.26) | 1.28 (0.84-1.95) |
| >2                                                                    | 0.78 (0.47-1.31) | 0.73 (0.27-2.01) |
| Year of entry into the cohort                                         |                  |                  |
| 2007                                                                  | 1                | 1                |
| 2008                                                                  | 1.14 (1.01-1.29) | 1.01 (0.81-1.26) |
| 2009                                                                  | 1.03 (0.90-1.18) | 1.02 (0.80-1.30) |
| 2010                                                                  | 1.16 (1.00-1.34) | 0.92 (0.70-1.20) |
| 2011                                                                  | 1.12 (0.93-1.36) | 1.02 (0.72-1.45) |
| 2012                                                                  | 1.27 (1.05-1.53) | 1.13 (0.81-1.58) |
| 2013                                                                  | 1.40 (1.11-1.78) | 1.09 (0.68-1.75) |
| 2014                                                                  | 1.45 (1.11-1.88) | 1.07 (0.63-1.81) |
| 2015                                                                  | 0.98 (0.59-1.65) | 0.18 (0.02-1.31) |
| AIDS municipal incidence among individuals in the cohort <sup>2</sup> | 1.00 (1.00-1.00) | 1.00 (1.00-1.00) |
| Time receiving Bolsa Família, months                                  | 1.00 (1.00-1.00) | 1.00 (0.99-1.00) |
| Municipal unemployment rate                                           | 1.00 (0.99-1.01) | 1.01 (0.98-1.03) |
| Hospital beds per 1,000 inhabitants                                   | 1.05 (1.03-1.07) | 1.06 (1.03-1.09) |

312 RRA=rate risk adjusted by sex, age, skin color, education, per capita expenditures, home construction material,  
313 number of people per room, year of entry into the cohort, time receiving Bolsa Família (in months), AIDS municipal  
314 incidence in the cohort, water supply, lighting, sewage, garbage disposal, municipal unemployment rate, hospital  
315 beds per 1,000 inhabitants

316 1- Taipa is a construction method that consists of using clay and wood to build houses

317 2- Annual cumulative AIDS incidence for each individual's municipality of residence from the study cohort

318 CI=Confidence Interval; FHS= Family Health Strategy; %MW - Proportional to the baseline minimum wage

319

320 In the subgroup analyses (table 4), the FHS association with AIDS incidence  
321 was slightly larger among women (RR 0.70, 95% CI 0.61–0.82), but was significantly  
322 stronger for people aged 35 and older (RR 0.62, 95% CI 0.53–0.72). Regarding AIDS  
323 mortality, the FHS association was slightly larger among men (RR 0.64, 95ut % CI  
324 0.49–0.83), and significantly stronger among people aged 35 and older (RR 0.56, 95%  
325 CI 0.43–0.72) (Table 4).

326 Table 4. Inverse probability of treatment weighting Poisson regression models, adjusted for all  
327 demographic and socioeconomic variables, for the association between AIDS incidence and  
328 mortality and Family Health Strategy coverage by sex and age, Brazil, 2007–15

| Variables | AIDS Incidence<br>RRa (95%CI) | AIDS Mortality<br>RRa (95%CI) |
|-----------|-------------------------------|-------------------------------|
|-----------|-------------------------------|-------------------------------|

---

|             |                  |                  |
|-------------|------------------|------------------|
| Sex         |                  |                  |
| Female      | 0.70 (0.61-0.82) | 0.71 (0.54-0.93) |
| Male        | 0.79 (0.69-0.91) | 0.64 (0.49-0.83) |
| Age (years) |                  |                  |
| 13-34       | 0.83 (0.72-0.96) | 0.77 (0.58-1.03) |
| ≥35         | 0.62 (0.53-0.72) | 0.56 (0.43-0.72) |

---

329 RRA=rate risk adjusted for sex, age, skin color, education, per capita expenditures, home construction material,  
330 number of people per room, year of entry into the cohort, time receiving Bolsa Família (in months), AIDS municipal  
331 rate in the cohort, water supply, lighting, sewage, garbage disposal, municipal unemployment rate, and hospital  
332 beds per 1,000 inhabitants.

333 CI=Confidence Interval

334

335 All sensitivity analyses confirmed the robustness of the findings, and all  
336 triangulation analyses showed a high degree of confidence in the impact estimation  
337 (Appendix, p. 8-24).

338

## 339 Discussion

340

341 To the best of our knowledge, this is the first study that evaluates the effect of  
342 a nationwide, community-based PHC strategy on AIDS incidence and mortality in a  
343 low- and middle-income country. Using a cohort of 3,435,068 individuals and 2,721  
344 new AIDS cases with a robust quasi experiment design, we found a strong effect of  
345 FHS coverage on the reduction of both AIDS incidence and mortality. Moreover, FHS  
346 showed a stronger impact among individuals ≥35 years old.

347 These findings add to evidence that the FHS is a robust community-based PHC  
348 model associated with improved population health outcomes.<sup>19,20</sup> Another recent  
349 quasi-experiment using a similar cohort and design demonstrated that the FHS was  
350 also negatively associated with tuberculosis morbidity and mortality.<sup>20</sup>

351 Strengthening and expanding PHC are recommended strategies to end AIDS  
352 by 2030.<sup>3</sup> The rationale is that PHC is highly accessible, especially for those with  
353 greater social vulnerability,<sup>2</sup> who are heavily affected by AIDS incidence and  
354 mortality.<sup>24</sup> PHC can foster greater trust with patients and by serving as the entry point



355 to the health system can better facilitate access to HIV diagnosis through rapid testing,  
356 linkage to treatment services and enable early initiation of ART, all of which are directly  
357 related to the reduction of AIDS incidence.<sup>2,25,26</sup> HIV prevention actions carried out in  
358 PHC, such as sex education, family planning with condom distribution, follow-up and  
359 counseling of pregnant and postpartum women living with HIV/AIDS, distribution of  
360 syringes and needles to reduce harm among injecting drug users and offering PrEP  
361 and PEP, can play an essential role in reducing the incidence of HIV and its  
362 progression to AIDS.<sup>3,27</sup> It is important to point out that PrEP and PEP were introduced  
363 in Brazil in 2018, therefore its effects on the treatment were not evaluated in the  
364 present study.<sup>28</sup>

365 PHC should be the ideal place for managing AIDS, since like other chronic  
366 conditions it requires maintaining long-term treatments<sup>2</sup> as well as dealing with other  
367 health problems unrelated to HIV, but that come with the increased life expectancy of  
368 PLWH. Centralized services that focus only on HIV/AIDS services may increase  
369 stigma among people living with the disease<sup>12</sup> and are limited in their ability to provide  
370 comprehensive and integrated care. PHC services, like the FHS, establish long-term  
371 ties with users and serve as their medical home, which can increase adherence to  
372 AIDS treatment and reduce mortality.<sup>29</sup> In the FHS, regular home visits, carried out by  
373 CHWs, are an important tool for monitoring ART adherence, helping individuals to gain  
374 access to other health and social services, identifying other behavioral or  
375 environmental risk factors, and delivering tailored education interventions.<sup>29</sup> A  
376 previous study carried out in Brazil showed that the introduction of rapid testing  
377 combined with ART—regardless of the patient's immunosuppression—reduced AIDS  
378 incidence and mortality by 60% and 73%, respectively.<sup>28</sup>

379           The effects of PHC on AIDS incidence and mortality were stronger among older  
380 people, a result that was also expected since older people in Brazil tend to have  
381 greater access to PHC services.<sup>30</sup> In Brazil, AIDS mortality is higher among the  
382 elderly,<sup>31</sup> which makes the results of this study even more relevant. However, it is  
383 noteworthy that we also found a relevant effect of the FHS in reducing AIDS incidence  
384 among people aged 13-34 years. Due to their higher vulnerability to HIV/AIDS,  
385 younger populations are a national priority for preventive actions in Brazil.<sup>27</sup> Our  
386 findings are particularly relevant, given that there are studies showing that youths  
387 linked to care initiate ART and achieve viral suppression at lower rates than older  
388 adults, due to their lower levels of interest in communicable and noncommunicable  
389 disease care (which is less prevalent among younger people) and competing priorities,  
390 such as those related to social, educational and economic advancement, that  
391 outweighed younger adults' health concerns, resulting in lower care engagement.<sup>32</sup>  
392 On the other hand, when adolescents and youth receive counseling regarding ART  
393 adherence, as well as support and referral for psychosocial problems, they had better  
394 retention in ART.<sup>33</sup>

395

## 396 Strengths and limitations of this study

397           This study has limitations. First, the positive effects of the FHS found in this  
398 study are not representative nationally, because all individuals included in the study  
399 were derived from the 100 Million Brazilians Cohort, which contains individuals of  
400 lower socioeconomic status. Even so, the AIDS incidence rate found in the total  
401 population of our study (15.0/100,000 inhabitants, 95%CI:14.4-15.6) was very similar  
402 to that of the country in 2021 (16.5/100,000 inhabitants).<sup>21</sup> Second, we estimated the  
403 effect of FHS on AIDS outcomes by adjusting models for multiple socioeconomic

404 variables, nonetheless some unobserved confounders (such as specific  
405 characteristics of individuals or variations across municipalities) may not have been  
406 accounted for in propensity score-based models. For this reason, we incorporated a  
407 wide range of individual-level and municipal-level factors as covariates in regression  
408 analyses, and we included the endemic levels of AIDS in the municipality as an  
409 adjusting variable that represent non-observed factors associated with the local  
410 burden of AIDS before the implementation of the intervention. Results from sensitivity  
411 analyses showed that the inclusion of other variables related to inequalities,  
412 infrastructure, and healthcare assistance at the municipal level do not affect the FHS  
413 effect estimates (Appendix p. 8). Moreover, variables related to sexual behavior, such  
414 as marital status and self-identification as Men who have Sex with Men (MSM), which  
415 were not included in the main models because of the elevated number of missing  
416 values, were nevertheless equally distributed among treated and untreated groups  
417 and indicated a predominant heterosexual HIV transmission (self-declared MSM were  
418 13.0% among all AIDS cases) in our cohort of low-income individuals, the percentage  
419 of MSM among the linked AIDS cases was particularly low compared to the national  
420 proportion of 42.9% in 2021.<sup>21</sup> Furthermore, when incorporated in the regression  
421 models they did not change the direction or magnitude of the results (Appendix p. 11-  
422 14). Third, our outcome variables were AIDS-related incidence and mortality (and not  
423 HIV incidence) because mandatory notification for HIV only started in 2014 in Brazil.<sup>27</sup>  
424 However, complementary analyses showed a significant negative association  
425 between FHS coverage and HIV incidence in 2014-15. Forth, to avoid sparse data, we  
426 defined “untreated” individuals as those living in municipalities with <20% FHS  
427 coverage. However, sensitivity analyses showed no relevant changes to our results  
428 when the untreated groups were defined as those living in municipalities with 0% or

429 <10% FHS coverage (Appendix p. 8). Finally, while the FHS has been found to be a  
430 robust model of PHC, not all FHS providers deliver care that is appropriate for some  
431 populations at high risk of HIV infection, such as LGBTQ+ individuals. Enhancing the  
432 ability of PHC providers to make care more welcoming, appropriate and effective for  
433 key populations at risk for HIV infection remains a challenge for the FHS and for PHC  
434 in many country contexts.

435 The main strengths of our study are first its unprecedentedly large cohort of  
436 individuals, AIDS cases, and AIDS deaths, and second the robust quasi-experiment  
437 design accompanied by a wide range of sensitivity analyses - which confirmed the  
438 robustness of the findings - and triangulation tests - that indicate a high degree of  
439 confidence in the results.

440

## 441 **Conclusion**

442

443 In conclusion, our findings show that a universal model of community-based  
444 PHC could significantly reduce incidence and mortality from AIDS in LMIC, and even  
445 decrease AIDS-related inequities among vulnerable populations. The results of this  
446 study justify the expansion and strengthening of effective PHC strategies globally to  
447 reach the Sustainable Development Goal of ending AIDS by 2030.

448

## 449 **Declaration of interests**

450 The authors declare no competing interests

451

## 452 **Acknowledgments**

453 Funding: Funded by the National Institute of Allergy and Infectious Diseases -  
454 NIAID/NIH, Grant Number: 1R01AI152938. We acknowledge support from the grant  
455 CEX2018-000806-S funded by MCIN/AEI/ 10.13039/501100011033, and support  
456 from the Generalitat de Catalunya through the CERCA Program. The funders had no  
457 role in the study design or in the decision to submit this manuscript.

458 We would like to thank all the members of the DSAIDS from Departments of Health  
459 Policy and Management and Community Health Sciences, Fielding School of Public  
460 Health, University of California (UCLA) for the invaluable discussions and suggestions  
461 during the development of this study and the CIDACS members responsible for  
462 linkage.

463

## 464 **Data sharing statement**

465 The data underlying this article will be shared on reasonable request to ISC/UFBA and  
466 CIDACS Fiocruz and after ethical approval.

467

## 468 **References**

469

- 470 UNAIDS. Global HIV & AIDS statistics - Fact Sheet 2022. Available at:  
471 <https://www.unaids.org/en/resources/fact-sheet>
- 472 Mukherjee JS, Barry D, Weatherford RD, Desai IK, Farmer PE. Community-Based ART Programs:  
473 Sustained Adherence and Follow-up. *Curr HIV/AIDS Rep* 2016; **13**: 359–66.
- 474 Bekker L-G, Alleyne G, Baral S, *et al*. Advancing global health and strengthening the HIV response in the  
475 era of Sustainable Development Goals: the International AIDS Society—Lancet Commission. *The  
476 Lancet* 2018; **392**: 312–58.
- 477 WHO/UNAIDS. The AIDS Response and Primary Health Care: Linkages and Opportunities. Technical  
478 series on Primary Health Care. World Health Organization. 2018. Available at:  
479 [https://www.who.int/docs/default-source/primary-health-care-conference/aids.pdf?sfvrsn=189b259b\\_2](https://www.who.int/docs/default-source/primary-health-care-conference/aids.pdf?sfvrsn=189b259b_2)
- 480 Havlir DV, Balzer LB, Charlebois ED, *et al*. HIV Testing and Treatment with the Use of a Community Health  
481 Approach in Rural Africa. *New England Journal of Medicine* 2019; **381**: 219–29.
- 482 Kamyar R, Petersen ML, Kabami J, *et al*. SEARCH Human Immunodeficiency Virus (HIV) Streamlined  
483 Treatment Intervention Reduces Mortality at a Population Level in Men With Low CD4 Counts. *Clinical  
484 Infectious Diseases* 2021; **73**: e1938–45.
- 485 Eshun-Abu I, Awotiwon AA, Germann A, *et al*. Effects of community-based antiretroviral therapy initiation  
486 model on HIV treatment outcomes: A systematic review and meta-analysis. *PLoS Med* 2021; **18**:  
487 e1003637.

- Geldsetzer P, Francis JM, Sando D, *et al.* Community delivery of antiretroviral drugs: A non-inferiority cluster-randomized pragmatic trial in Dar es Salaam, Tanzania. *PLoS Med* 2018; **15**: e1002659.
- Petersen M, Balzer L, Kwarsiima D, *et al.* Association of Implementation of a Universal Testing and Treatment Intervention With HIV Diagnosis, Receipt of Antiretroviral Therapy, and Viral Suppression in East Africa. *JAMA* 2017; **317**: 2196.
- Dave Peter T, Fogarty C, Karatzas N, Belinsky N, Pant Pai N. Which community-based HIV initiatives are effective in achieving UNAIDS 90-90-90 targets? A systematic review and meta-analysis of evidence (2007-2018). *PLoS One* 2019; **14**: e0219826.
- Fox M, Pascoe S, Huber AN, *et al.* Adherence clubs and decentralized medication delivery to support patient retention and sustained viral suppression in care: Results from a cluster-randomized evaluation of differentiated ART delivery models in South Africa. *PLoS Med* 2019; **16**: e1002874.
- Barnard R V, Szpiro AA, van Rooyen H, *et al.* Community-based antiretroviral therapy versus standard clinic-based services for HIV in South Africa and Uganda (DO ART): a randomised trial. *Lancet Glob Health* 2020; **8**: e1305–15.
- Melo M, Maksud I, Agostini R. HIV/Aids management at the primary care level in Brazil: a challenge for the Unified Health System? *Revista Panamericana de Salud Pública* 2018; **42**. DOI:10.26633/RPSP.2018.151.
- Macintyre J, Harris MJ. Brazil's Family Health Strategy — Delivering Community-Based Primary Care in a Unified Health System. *New England Journal of Medicine* 2015; **372**: 2177–81.
- Bastos L, Menzies D, Hone T, Dehghani K, Trajman A. The impact of the Brazilian family health on selected primary care sensitive conditions: A systematic review. *PLoS One* 2017; **12**: e0182336.
- Rasella D, Morais GA de S, Anderle RV, *et al.* Evaluating the impact of social determinants, conditional cash transfers and primary health care on HIV/AIDS: Study protocol of a retrospective and forecasting approach based on the data integration with a cohort of 100 million Brazilians. *PLoS One* 2022; **17**: e0265253.
- Barreto ML, Ichihara MY, Pescarini JM, *et al.* Cohort Profile: The 100 Million Brazilian Cohort. *Int J Epidemiol* 2022; **51**: e27–38.
- Barboza GCG, Ali MS, Araujo B, *et al.* CIDACS-RL: a novel indexing search and scoring-based record linkage system for huge datasets with high accuracy and scalability. *BMC Med Inform Decis Mak* 2020; **20**: 289. 517
- Rasella D, Harhay MO, Pamponet ML, Aquino R, Barreto ML. Impact of primary health care on mortality from heart and cerebrovascular diseases in Brazil: a nationwide analysis of longitudinal data. *BMJ* 2014; **349**: g4014–g4014.
- Jesus S, Pescarini JM, Silva AF, *et al.* The effect of primary health care on tuberculosis in a nationwide cohort of 3 million Brazilian people: a quasi-experimental study. *Lancet Glob Health* 2022; **10**: e390–7.
- Brasil. Boletim Epidemiológico HIV/Aids. Secretaria de Vigilância em Saúde. Ministério da Saúde. Brasília, Número Especial, Dez., 2022. Available at: <https://www.gov.br/aids/pt-br/centrais-de-conteudo/boletins-epidemiologicos/2022/hiv-aids>
- Andrade MV, Coelho AQ, Xavier Neto M, Carvalho LR de, Atun R, Castro MC. Brazil's Family Health Strategy: factors associated with programme uptake and coverage expansion over 15 years (1998–2012). *Health Policy Plan* 2018; **33**: 368–80
- Lawlor DA, Tilling K, Davey Smith G. Triangulation in aetiological epidemiology. *Int J of Epidemiol* 2016; **45**: 1860–86
- Lua I, Silva AF, Guimarães NS, *et al.* The effects of social determinants of health on acquired immune deficiency syndrome in a low-income population of Brazil: a retrospective cohort study of 28.3 million individuals. *Lancet Reg Health Am* 2023; **24**: 100554
- Leberer S, McMullen H, Anderson J, *et al.* Promotion of rapid testing for HIV in primary care (RHIVA2): a cluster-randomised controlled trial. *Lancet HIV* 2015; **2**: e229–35.

- Hayes 536, Donnell D, Floyd S, *et al.* Effect of Universal Testing and Treatment on HIV Incidence — HPTN 071 (P307ART). *New England Journal of Medicine* 2019; **381**: 207–18.
- Brasil 538  
539  
540  
541  
542  
543  
544  
545  
546  
547  
548  
549  
550  
551  
552  
553  
554  
555  
556
- Prevenção Combinada do HIV/Bases conceituais para profissionais, trabalhadores(as) e gestoras(es) de saúde. Ministério da Saúde, Secretaria de Vigilância em Saúde Departamento de Vigilância, Prevenção e Controle das Infecções Sexualmente Transmissíveis, do HIV/Aids e das Hepatites Virais  
Brasília: Ministério da Saúde, 2017. Available at: [https://www.gov.br/aids/pt-br/centrais-de-contato/publicacoes/2017/prevencao\\_combinada\\_-\\_bases\\_conceituais\\_web.pdf/view](https://www.gov.br/aids/pt-br/centrais-de-contato/publicacoes/2017/prevencao_combinada_-_bases_conceituais_web.pdf/view)
- Pereira 543  
544  
545  
546  
547  
548  
549  
550  
551  
552  
553  
554  
555  
556
- GF, Sabido M, Caruso A, Benzaken AS. Decline in reported AIDS cases in Brazil after implementation of the test and treat initiative. *BMC Infect Dis* 2019; **19**: 579.
- Fatti 545  
546  
547  
548  
549  
550  
551  
552  
553  
554  
555  
556
- Moithibi E, Shaikh N, Grimwood A. Improved long-term antiretroviral treatment outcomes amongst patients receiving community-based adherence support in South Africa. *AIDS Care* 2016; **28**: 1365–72.
- Kessler 547  
548  
549  
550  
551  
552  
553  
554  
555  
556
- Thumé E, Marmot M, *et al.* Family Health Strategy, Primary Health Care, and Social Inequalities in Mortality Among Older Adults in Bagé, Southern Brazil. *Am J Public Health* 2021; **111**: 927–36.
- Cunha 549  
550  
551  
552  
553  
554  
555  
556
- da, Cruz MM da, Pedroso M. Analysis of the trend of mortality from HIV/AIDS according to sociodemographic characteristics in Brazil, 2000 to 2018. *Cien Saude Colet* 2022; **27**: 895–908.
- Cham 550  
551  
552  
553  
554  
555  
556
- G, Kanya MR, Petersen ML, Havlir D V. Reaching 90–90–90 in rural communities in East Africa. *Curr HIV AIDS* 2019; **14**: 449–54.
- Fatti 553  
554  
555  
556
- Jackson D, Goga AE, *et al.* The effectiveness and cost-effectiveness of community-based support for adolescents receiving antiretroviral treatment: an operational research study in South Africa. *J Int AIDS Soc* 2018; **21**: e25041.

**114,008,306** individuals from *The 100 Million Brazilians Cohort Baseline (2001-2015)* linked with Mortality Information System (SIM) and Notifiable Diseases Information System (SINAN-HIV/AIDS)

Excluded: **60,998,197** individuals registered in the cohort before 2007

Excluded (n=24,683,846; 28,788 AIDS diagnoses; 3,462 AIDS-related deaths)  
**24,606,053** individuals aged less than 13 years (664 AIDS diagnoses, 276 AIDS-related deaths)  
**50,322** individuals who died before cohort application (891 AIDS diagnoses, 751 AIDS-related deaths)  
**146** individuals who died before AIDS diagnosis (146 AIDS diagnoses, 121 AIDS-related deaths)  
**26,894** individuals who were diagnosed with AIDS before cohort application (2,283 AIDS-related deaths)  
**431** individuals with probable vertical transmission by AIDS (193 AIDS diagnoses, 31 AIDS-related deaths)

Excluded: (n=24,891,195; 27,674 AIDS diagnoses, 8,586 AIDS-related-deaths)  
**24,068,946** individuals residing in municipalities with FHS coverage between 20% and 99% (27,115 AIDS diagnoses, 8,445 AIDS-related deaths)  
**822,249** individuals with missing values for socioeconomic variables (559 AIDS diagnoses, 141 AIDS-related deaths)

**3,435,068** individuals  
**2,721** AIDS diagnoses  
**819** AIDS-related deaths

**2,829,178** covered by FHS (treated)  
**2,048** AIDS diagnoses  
**601** AIDS-related deaths

**605,890** not covered by FHS (untreated)  
**673** AIDS diagnoses  
**218** AIDS-related deaths

Figure 1. Selection flowchart of the study cohort, The 100 Million Brazilians Cohort, 2007-15
